# Supplementary material for: Bifidobacterium bifidum DS0908 and Bifidobacterium longum DS0950 Culture-Supernatants Ameliorate Obesity-Related Characteristics in Mice with High-Fat Diet-Induced Obesity
Source: PubMed Central journal article supplement (PMC9899789; doi:10.4014/jmb.2210.10046), 2022-11-22
Supplement: jmb-33-1-96-supple.pdf [file jmb-33-1-96-supple.pdf]

## Supplementary Materials

### ***Bifidobacterium bifidum* DS0908 and *Bifidobacterium longum* DS0950 culture-supernatants ameliorate obesity-related characteristics in mesenchymal stem cells and mice with high-fat diet-induced obesity**

MS Rahman<sup>1,2,#</sup>, Y Lee<sup>1,2,#</sup>, DS Park<sup>3</sup>, and YS Kim<sup>1,2,\*</sup>

<sup>1</sup> Institute of Tissue Regeneration, College of Medicine, Soonchunhyang University, Cheonan, Chung-nam 31151, Republic of Korea

<sup>2</sup> Department of Microbiology, College of Medicine, Soonchunhyang University, Cheonan, Chung-nam 31151, Republic of Korea

<sup>3</sup> Biological Resource Center, Korea Research Institute of Bioscience and Biotechnology, Jeongeup, Republic of Korea

# These authors contributed equally

\* Corresponding author:

Yong-Sik Kim, Ph.D.

Email: [yongsikkim@sch.ac.kr](mailto:yongsikkim@sch.ac.kr)

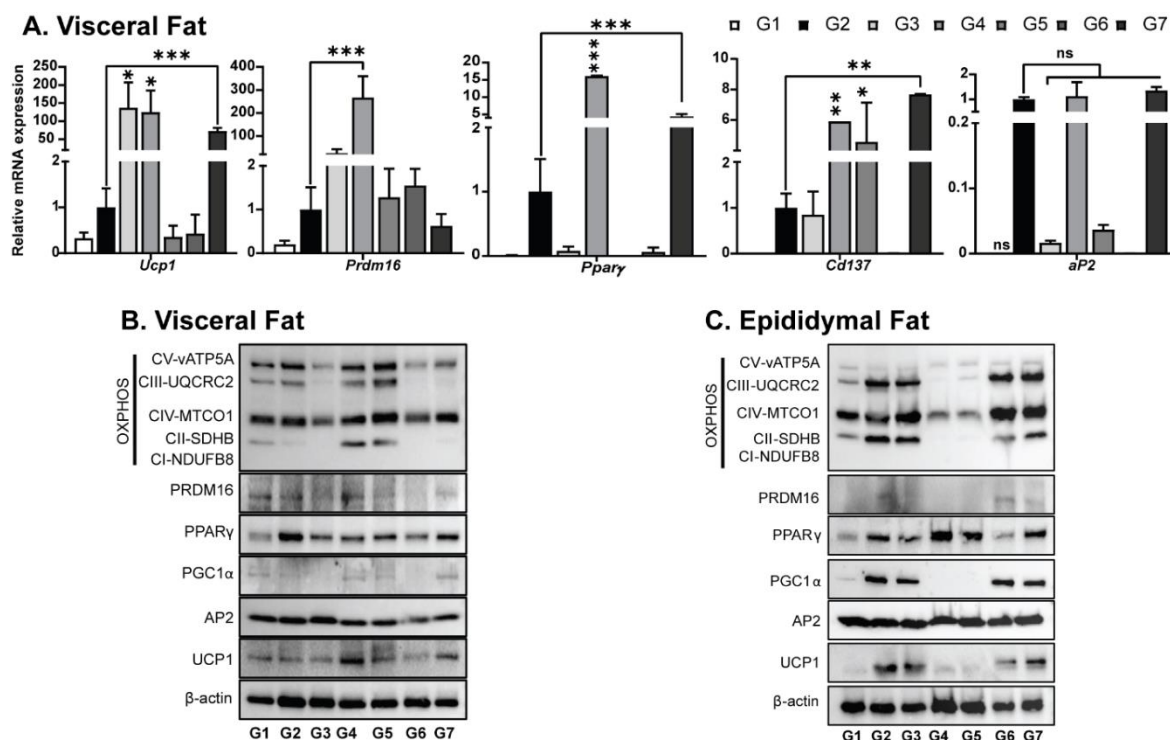

**Figure S1. Effect of DS0908 and DS0950 administration on the expression of brown adipocyte-specific markers in mice with HFD-induced obesity.** (A) *Ucp1*, *Prdm16*, *Ppar $\gamma$* , *Cd137* and *aP2* mRNA expression levels. (B and C) UCP1, AP2, PGC-1 $\alpha$ , PPAR $\gamma$ , PRDM16 and mitochondrial oxidative phosphorylation protein expression levels in the visceral and epididymal fat of DS0908 and DS0950-administered mice with HFD-induced obesity. *Tbp* was used as an internal control gene and  $\beta$ -actin as a protein loading control. The data from three individual experiments are expressed as the average  $\pm$  standard error mean (SEM). \*, \*\*, \*\*\* and ns indicate  $p < 0.05$ ,  $< 0.01$ ,  $< 0.001$  and non-significant, respectively, to express the statistically significant differences between the control (G2: HFD) and treatment groups. G1: Normal-fat diet (NFD); G2: High-fat diet (HFD); G3: BS DS0908 (DS0908); G4: BS DS0950

(DS0950); G5: BP DS0908 (DS0908;  $10^9$  cells/kg); G6: BP DS0950 (DS0950;  $10^9$  cells/kg); G7: Rosiglitazone (Rosi; 10 mg/kg); BS = bacterial supernatant; BP = bacterial pellets.

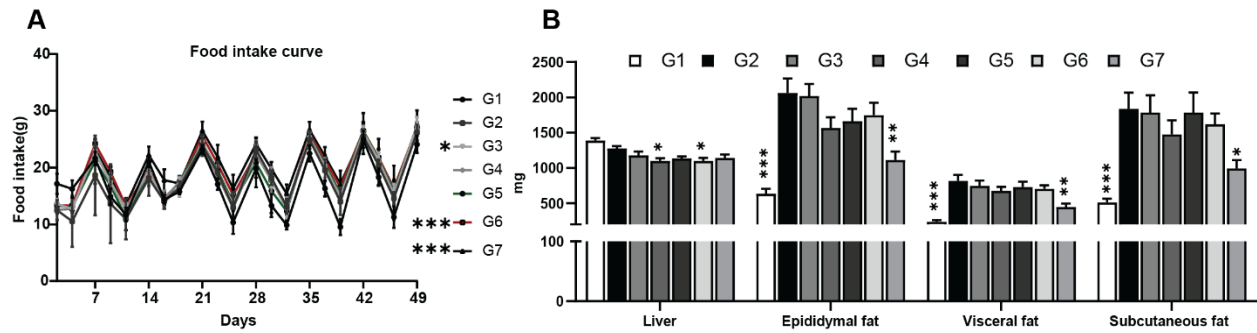

**Figure S2. DS0908 and DS0950 supplementation reduces organ weight in mice with HFD-induced obesity.** (A) Food intake changes in DS0908- and DS0950-administered mice with HFD-induced obesity. (B) Organ weight measurements (epididymal, visceral and subcutaneous fat, as well as liver). The data are expressed as the average  $\pm$  standard error mean (SEM). \*, \*\*, \*\*\* and ns indicate  $p < 0.05$ ,  $< 0.01$ ,  $< 0.001$  and non-significant, respectively, to express the statistically significant differences between the control (G2: HFD) and treatment groups. G1: Normal-fat diet (NFD); G2: High-fat diet (HFD); G3: BS DS0908 (DS0908); G4: BS DS0950 (DS0950); G5: BP DS0908 (DS0908;  $10^9$  cells/kg); G6: BP DS0950 (DS0950;  $10^9$  cells/kg); G7: Rosiglitazone (Rosi; 10 mg/kg); BS = bacterial supernatant; BP = bacterial pellets.

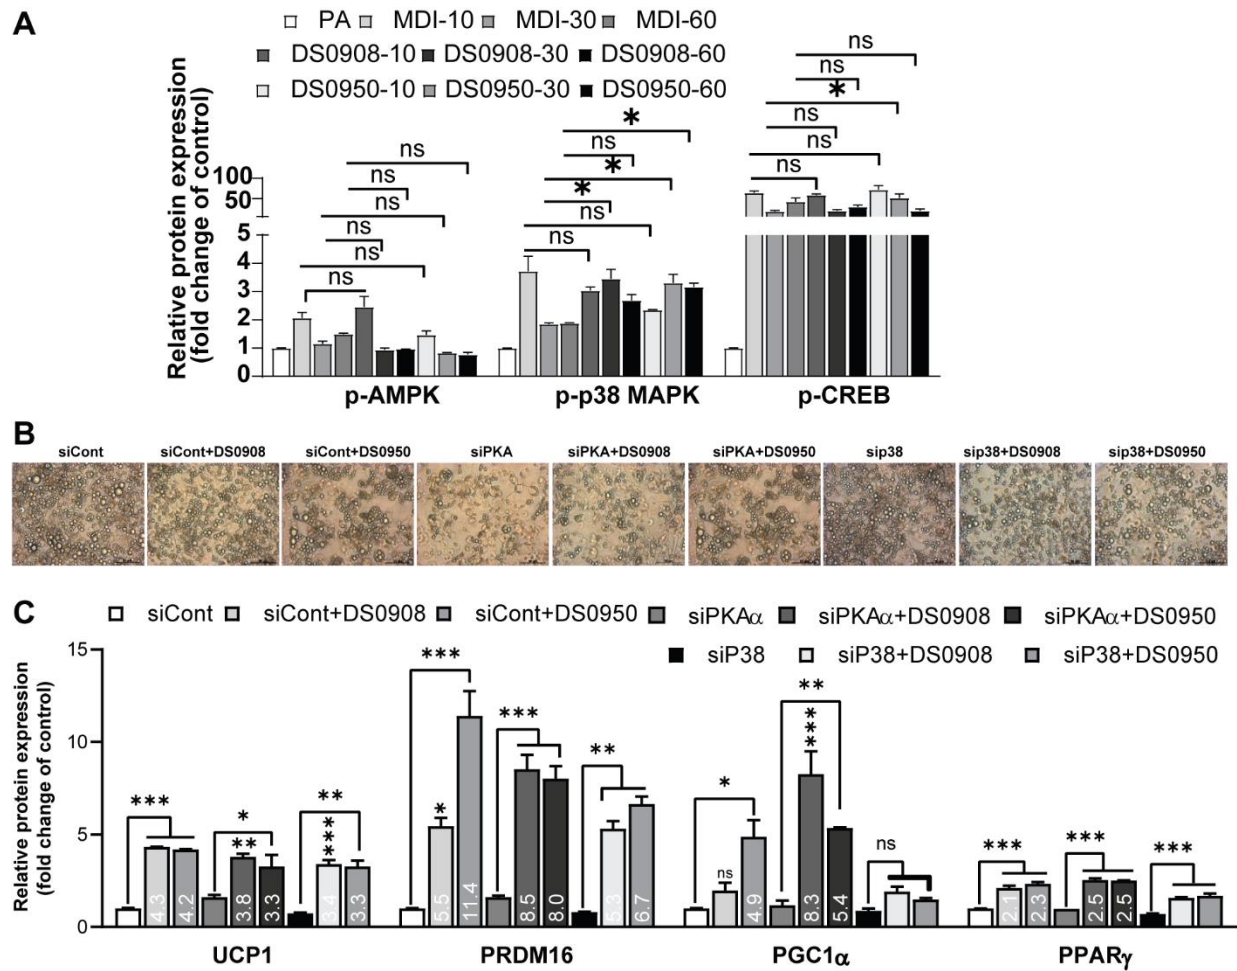

**Figure S3. DS0908 and DS0950 culture-supernatants activate thermogenesis via PKA-p38 MAPK signaling in C3H10T1/2 MSCs.** (A) Phosphorylated protein expression levels of p-p38 MAPK, p-CREB and p-AMPK after incubation with DS0908 and DS0950 for 10, 30 and 60 min. (B) Microscopic images of lipid droplet in *Pkaa* and *p38 MAPK $\alpha$* -knockdown cells, and treatment with DS0908 and DS0950 (siPkaa/sip38 MAPK $\alpha$  + DS0908 or DS0950 group) and control siRNA and treatment with DS0908 or DS0950 (siCont + DS0908 or DS0950 group). (C) Protein expression levels (UCP1, PGC1 $\alpha$ , PRDM16 and PPAR $\gamma$ ) were measured after silencing of *Pkaa* and *p38 MAPK $\alpha$*  and treatment with DS0908 or DS0950 (siPkaa/sip38 MAPK $\alpha$  +

DS0908 or DS0950 group) and control siRNA and treatment with DS0950 or DS0908 (siCont + DS0908 or DS0950 group). The gene knockdown experiments were designed as siCont vs. siCont + DS0908 or DS0950, siPka $\alpha$  vs. siPka $\alpha$  + DS0908 or DS0950 and sip38 MAPK $\alpha$  vs. sip38 MAPK $\alpha$  + DS0908 or DS0950. The protein expression band intensities were measured by with ImageJ. The data from three individual experiments are expressed as the average  $\pm$  standard error mean (SEM). \*, \*\*, \*\*\* and ns indicate  $p < 0.05$ ,  $< 0.01$ ,  $< 0.001$  and non-significant, respectively, to express the statistically significant differences between the control (MDI) and the treatment groups in the figures. Adipogenic differentiation medium, MDI: 0.5 mM IBMX, 1  $\mu$ M dexamethasone and 10  $\mu$ g/mL insulin; 1  $\mu$ M Rosiglitazone (Rosi); DS0908 = *B. bifidum* DS0908; DS0950 = *B. longum* DS0950.

**Supplementary Table 1. List of probiotic bacterial strains screened for anti-obesity effect.**

| Serial No. | Strains                  | Isolation No. | Strain No.            | Origin        | Source        |
|------------|--------------------------|---------------|-----------------------|---------------|---------------|
| 1          | <i>B. bifidum</i>        | 01S5          |                       | Infant        | faeces        |
| 2          | <i>B. breve</i>          | 01B6          |                       | Infant        | faeces        |
| 3          | <i>B. breve</i>          | 01B8          |                       | Infant        | faeces        |
| 4          | <i>B. bifidum</i>        | 02S3          |                       | Infant        | faeces        |
| 5          | <i>B. bifidum</i>        | 02S5          |                       | Infant        | faeces        |
| 6          | <i>B. bifidum</i>        | 02S8          |                       | Infant        | faeces        |
| 7          | <i>B. bifidum</i>        | 02S18         |                       | Infant        | faeces        |
| 8          | <i>B. longum</i>         | 05S61         |                       | Infant        | faeces        |
| 9          | <i>B. breve</i>          | 05S71         |                       | Infant        | faeces        |
| 10         | <i>B. breve</i>          | 05S76         |                       | Infant        | faeces        |
| 11         | <i>B. longum</i>         | 05B23         |                       | Infant        | faeces        |
| 12         | <i>B. longum</i>         | 06S63         |                       | Infant        | faeces        |
| <b>13</b>  | <b><i>B. bifidum</i></b> | <b>07S4</b>   | <b>DS0908 (HN002)</b> | <b>Infant</b> | <b>faeces</b> |
| 14         | <i>B. longum</i>         | 07S5          |                       | Infant        | faeces        |
| 15         | <i>B. bifidum</i>        | 07S8          |                       | Infant        | faeces        |
| 16         | <i>B. bifidum</i>        | 07S13         |                       | Infant        | faeces        |
| 17         | <i>B. longum</i>         | 07S14         |                       | Infant        | faeces        |
| 18         | <i>B. longum</i>         | 07S15         |                       | Infant        | faeces        |
| 19         | <i>B. bifidum</i>        | 07S25         |                       | Infant        | faeces        |
| 20         | <i>B. bifidum</i>        | 07S26         |                       | Infant        | faeces        |
| 21         | <i>B. bifidum</i>        | 07S29         |                       | Infant        | faeces        |
| 22         | <i>B. longum</i>         | 07S35         |                       | Infant        | faeces        |
| 23         | <i>B. longum</i>         | 07S37         |                       | Infant        | faeces        |
| 24         | <i>B. longum</i>         | 07S38         |                       | Infant        | faeces        |
| 25         | <i>B. longum</i>         | 07S41         |                       | Infant        | faeces        |
| 26         | <i>B. longum</i>         | 08S6          |                       | Infant        | faeces        |
| 27         | <i>B. longum</i>         | 08S18         |                       | Infant        | faeces        |
| <b>28</b>  | <b><i>B. longum</i></b>  | <b>08S22</b>  | <b>DS0950 (HN001)</b> | <b>Infant</b> | <b>faeces</b> |
| 29         | <i>B. longum</i>         | 08S40         |                       | Infant        | faeces        |
| 30         | <i>B. longum</i>         | 08S41         | DS0956                | Infant        | faeces        |
| 31         | <i>B. longum</i>         | 08S45         |                       | Infant        | faeces        |
| 32         | <i>B. longum</i>         | 08S46         |                       | Infant        | faeces        |
| 33         | <i>B. longum</i>         | 08S62         |                       | Infant        | faeces        |
| 34         | <i>B. longum</i>         | 08S643        |                       | Infant        | faeces        |
| 35         | <i>B. animalis</i>       | 08S70         |                       | Infant        | faeces        |
| 36         | <i>L. reuteri</i>        | MBF4116       |                       | Infant        | faeces        |
| 37         | <i>L. reuteri</i>        | AN417         |                       | Infant        | faeces        |
| 38         | <i>L. rhamnosus</i>      | B1            |                       | Infant        | faeces        |
| 39         | <i>L. rhamnosus</i>      | OMM118        |                       | Infant        | faeces        |

|    |                       |        |        |        |        |
|----|-----------------------|--------|--------|--------|--------|
| 40 | <i>L. rhamnosus</i>   | OMM228 |        | Infant | faeces |
| 41 | <i>L. rhamnosus</i>   | B1S1   |        | Infant | faeces |
| 42 | <i>L. rhamnosus</i>   | B2S1   |        | Infant | faeces |
| 43 | <i>L. gasseri</i>     | MBF402 |        | Infant | faeces |
| 44 | <i>L. gasseri</i>     | MF203  |        | Infant | faeces |
| 45 | <i>L. gasseri</i>     | NM518  |        | Infant | faeces |
| 46 | <i>L. gasseri</i>     | MM332  |        | Infant | faeces |
| 47 | <i>L. gasseri</i>     | SM353  |        | Infant | faeces |
| 48 | <i>L. acidophilus</i> | C48    |        | Infant | faeces |
| 49 | <i>L. acidophilus</i> | S42    |        | Infant | faeces |
| 50 | <i>L. rhamnosus</i>   | B15    |        | Infant | faeces |
| 51 | <i>L. rhamnosus</i>   | OMM135 | DS0508 | Infant | faeces |
| 52 | <i>L. delbrueckii</i> | AN315  |        | Infant | faeces |
| 53 | <i>L. delbrueckii</i> | AN617  |        | Infant | faeces |
| 54 | <i>L. fermentum</i>   | C62    |        | Infant | faeces |
| 55 | <i>L. fermentum</i>   | SBF308 |        | Infant | faeces |
